# Supplementary material
Source: PubMed Central journal article supplement (PMC3011912)
Supplement: Supp_Data.pdf [file Supp_Data.pdf]

## Supplementary Data

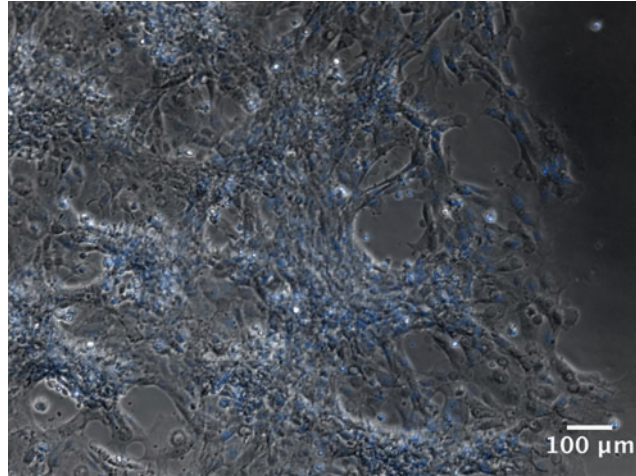

**SUPPLEMENTARY FIG. S1.** Formation of multicellular aggregate structures along the wound edge of RLE-6TN cells cultured on FnIII10. A wound healing assay was performed with RLE-6TN cells plated on FnIII10. Cells were allowed to form a monolayer around wound field inserts, which were removed 5 h post-seeding. Cells were allowed to migrate and close wound field for 15 h and then fixed, and nuclei stained. Cells were imaged at 10 $\times$  magnification to the immediate left of the wound field. Image is representative.
